# Supplementary material for: Simulation of extreme rainfall and streamflow events in small Mediterranean watersheds with a one-way-coupled atmospheric–hydrologic modelling system
Source: Copernicus journal article supplement (doi:10.5194/nhess-20-2791-2020), 2020-10-23
Supplement: Supplementary file 1 [file nhess-20-2791-2020-supplement.pdf]

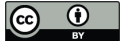

*Supplement of*

**Simulation of extreme rainfall and streamflow events in  
small Mediterranean watersheds with a one-way-coupled  
atmospheric–hydrologic modelling system**

**Corrado Camera et al.**

*Correspondence to:* Corrado Camera ([corrado.camera@unimi.it](mailto:corrado.camera@unimi.it))

The copyright of individual parts of the supplement might differ from the CC BY 4.0 License.

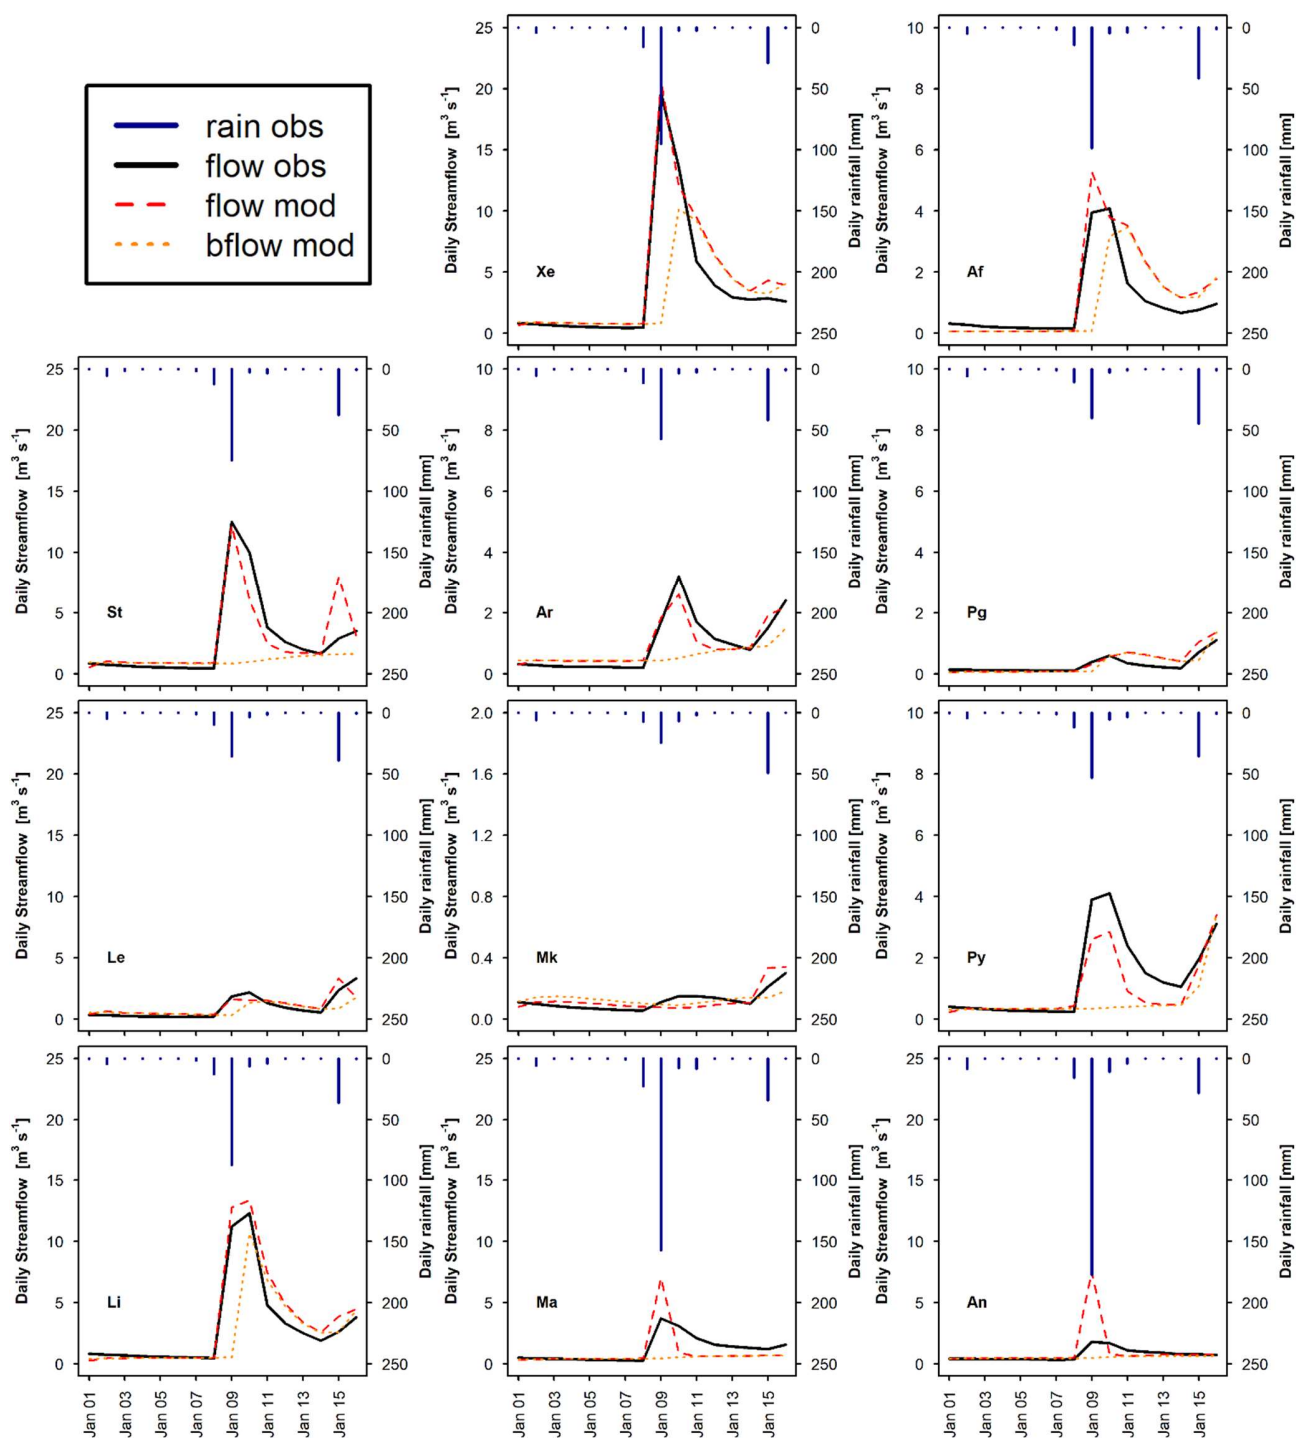

Fig. S1. Simulated flow (flow mod) - with baseflow component (bflow mod) - in comparison with observed flow (flow obs) obtained forcing the model with observed rainfall (rain obs) for the 22 watersheds and Jan-1989 event. For watersheds short names see Table 1

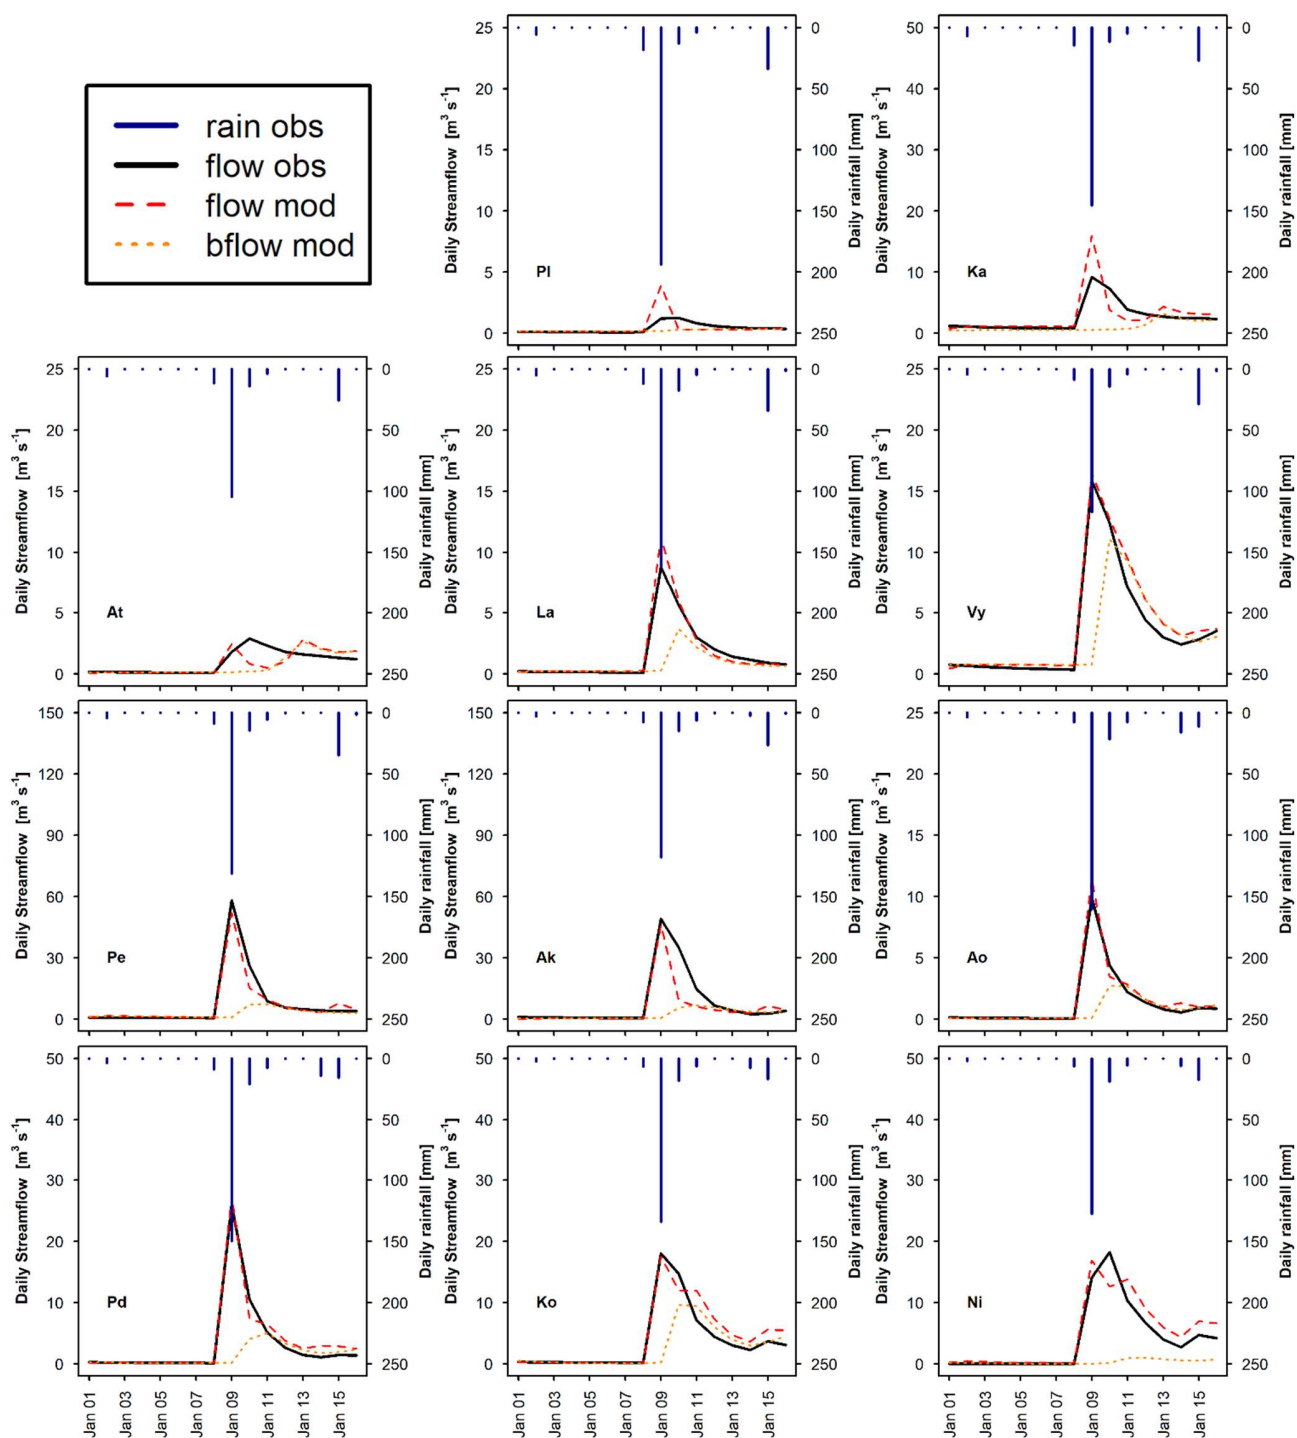

Fig. S1 - Continue

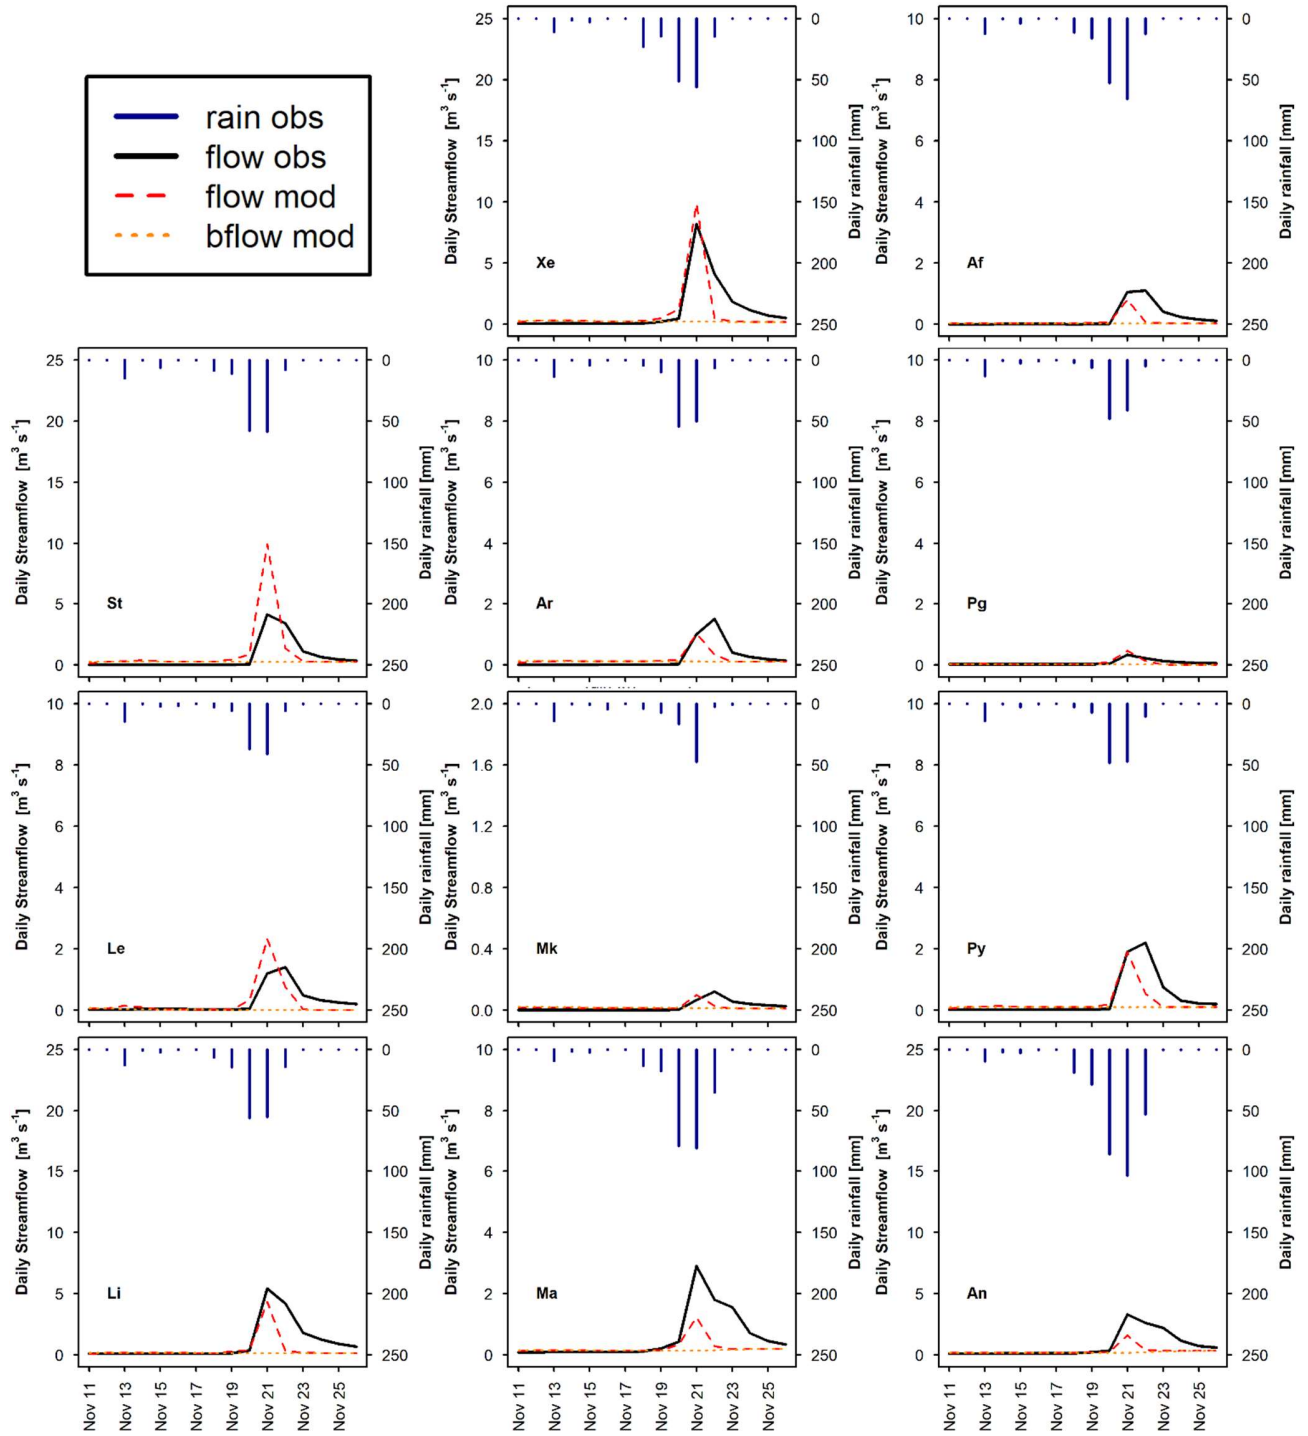

**Fig. S2.** Simulated flow (flow mod) - with baseflow component (bflow mod) - in comparison with observed flow (flow obs) obtained forcing the model with observed rainfall (rain obs) for the 22 watersheds and Nov-1994 event. For watersheds short names see Table 1.

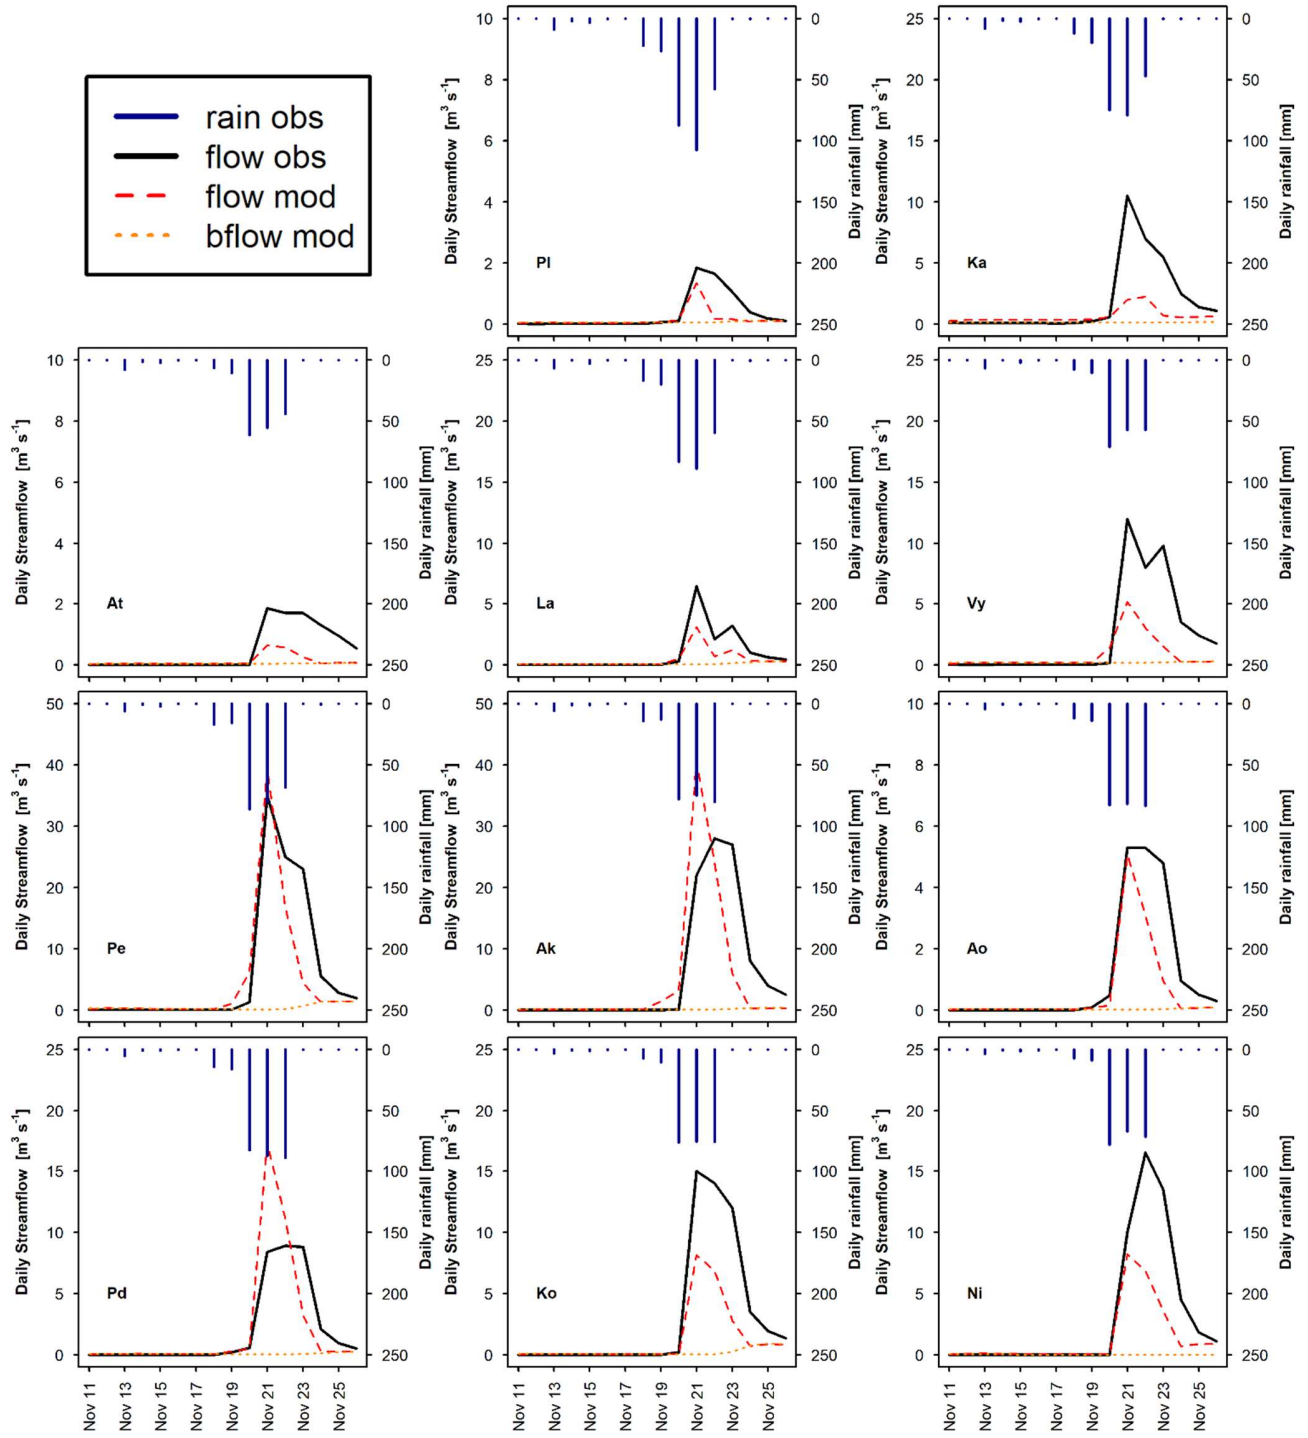

Fig. S2 - Continue

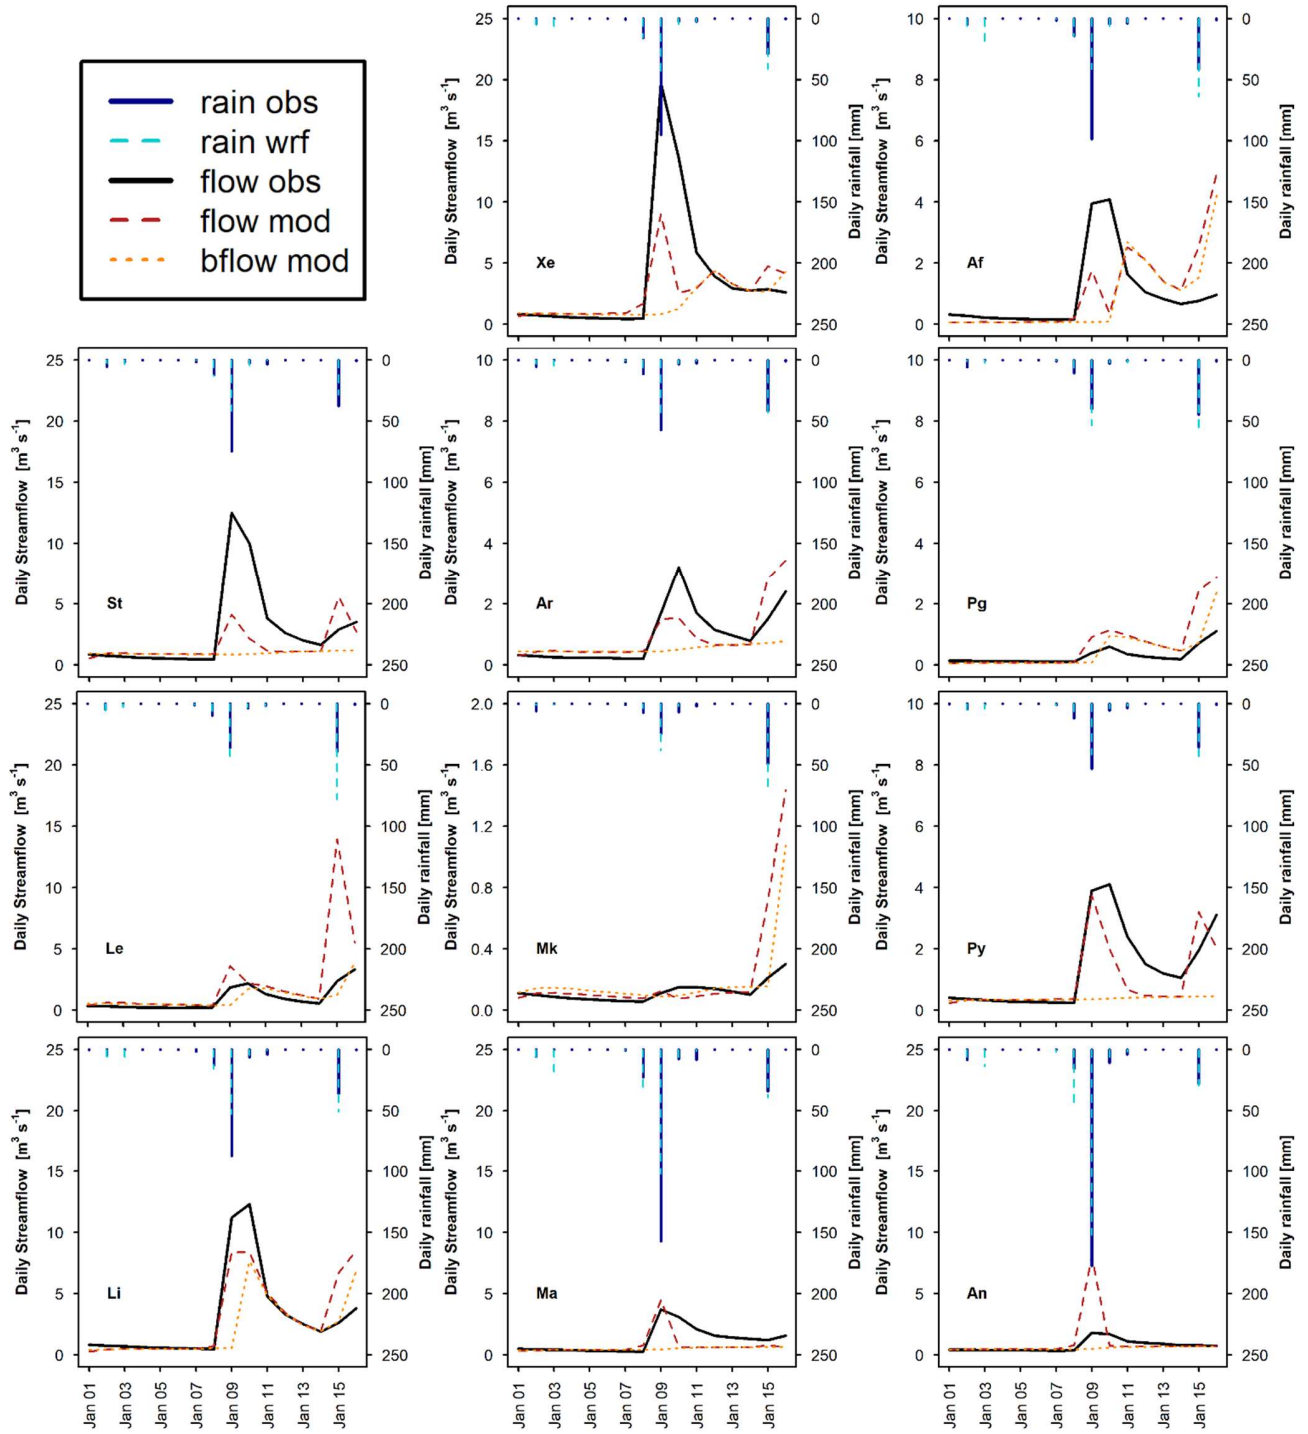

**Fig. S3.** Simulated flow (flow mod) - with baseflow component (bflow mod) - in comparison with observed flow (flow obs) obtained forcing the model with modelled rainfall (rain wrf) for the 22 watersheds and Jan-1989 event. For watersheds short names see Table 1.



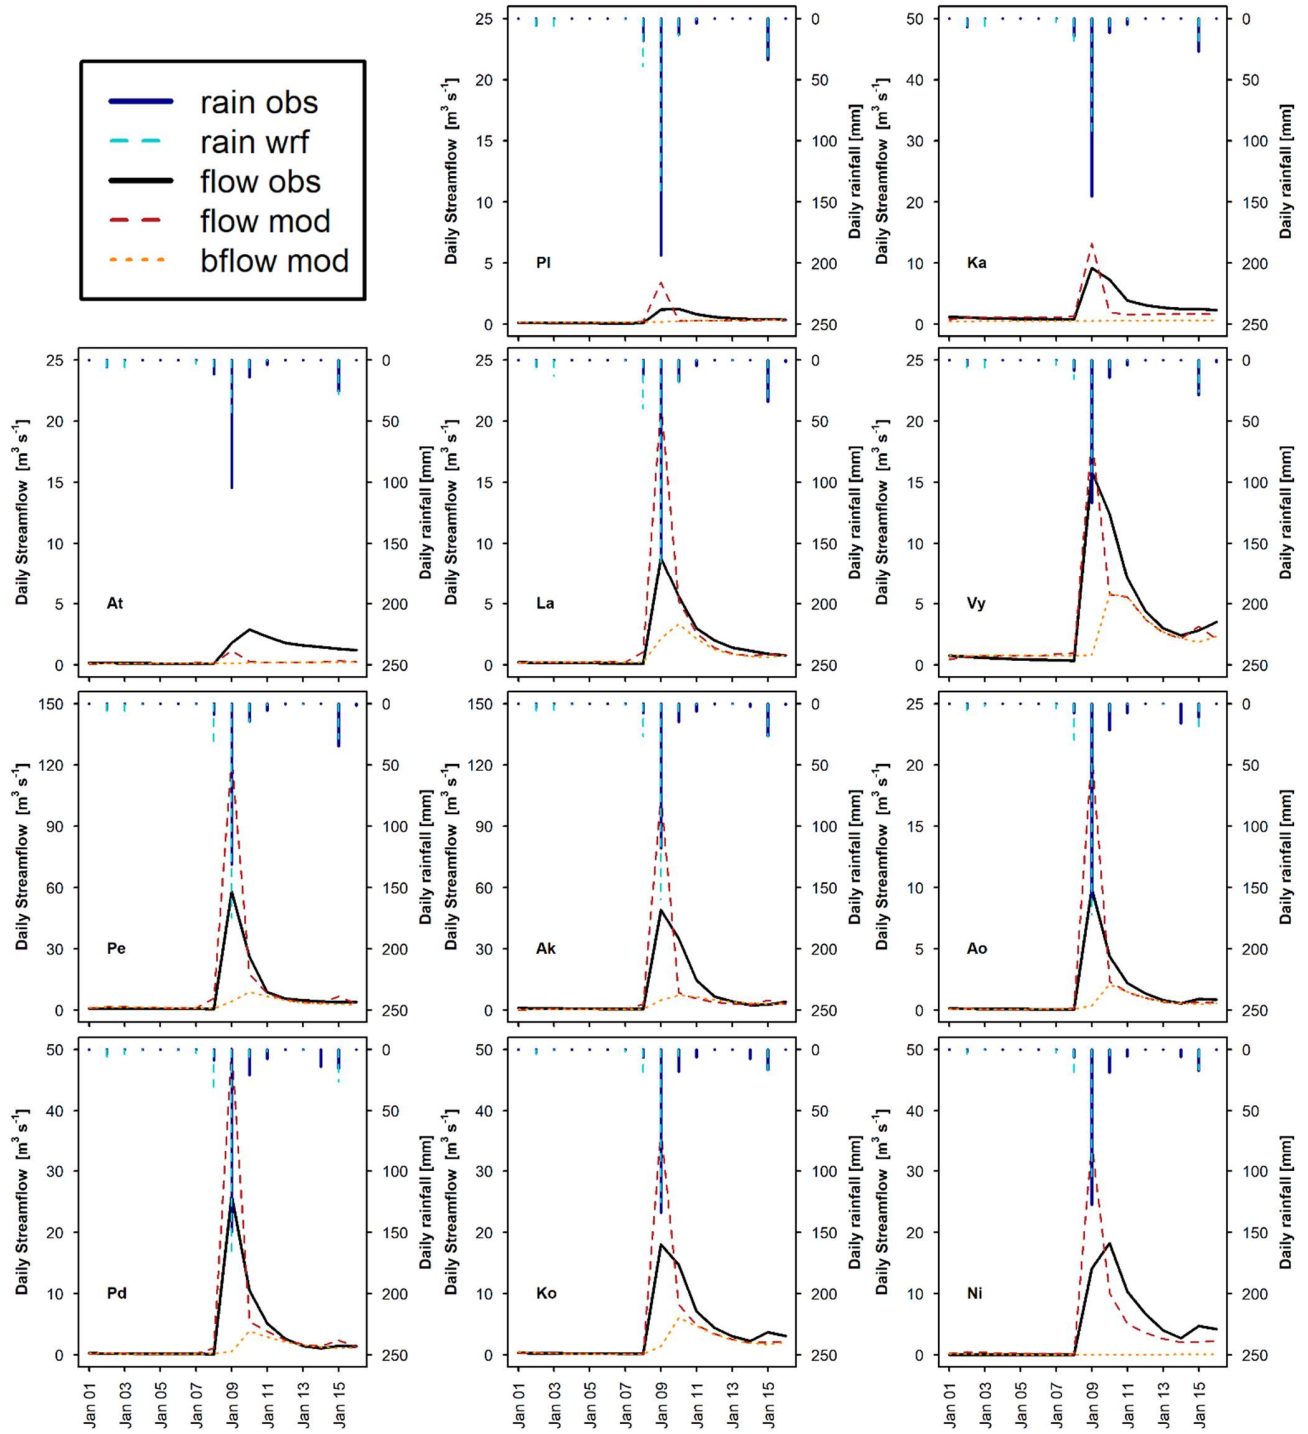

Fig. S3 - Continue

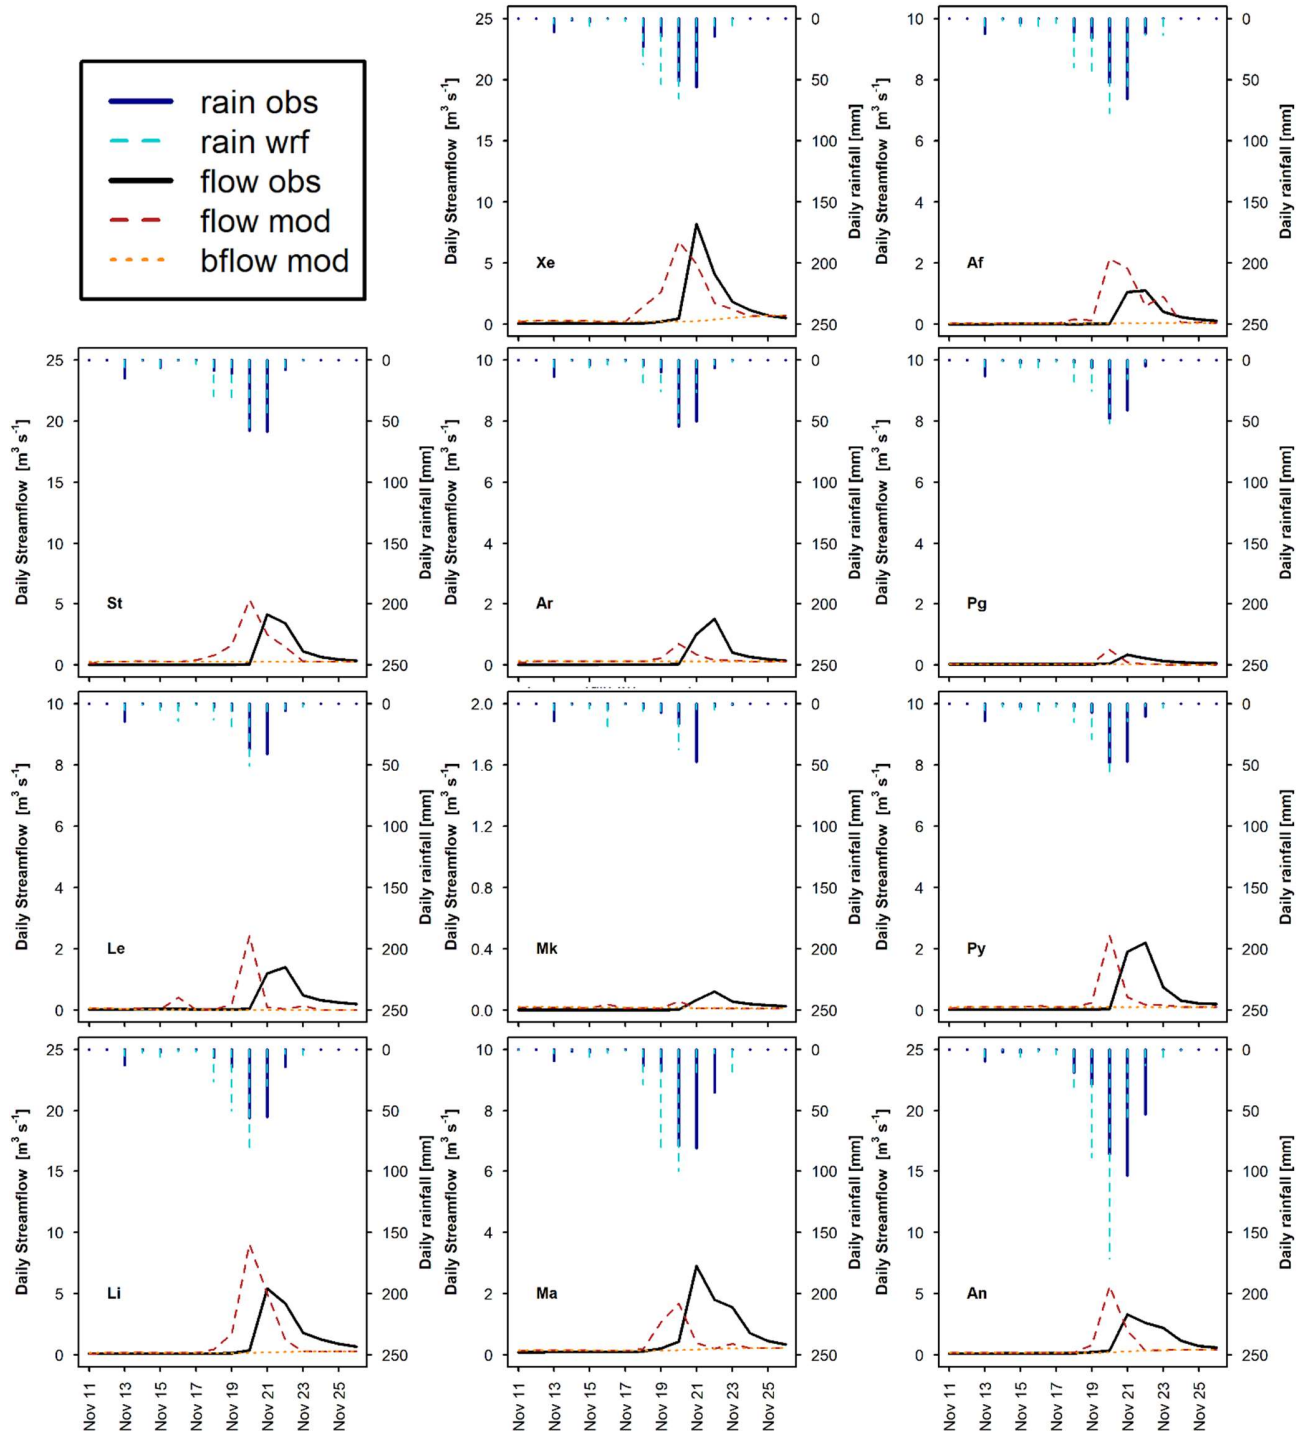

**Fig. S4. Simulated flow (flow mod) - with baseflow component (bflow mod) - in comparison with observed flow (flow obs) obtained forcing the model with modelled rainfall (rain wrf) for the 22 watersheds and Nov-1994 event. For watersheds short names refer to Table 1.**



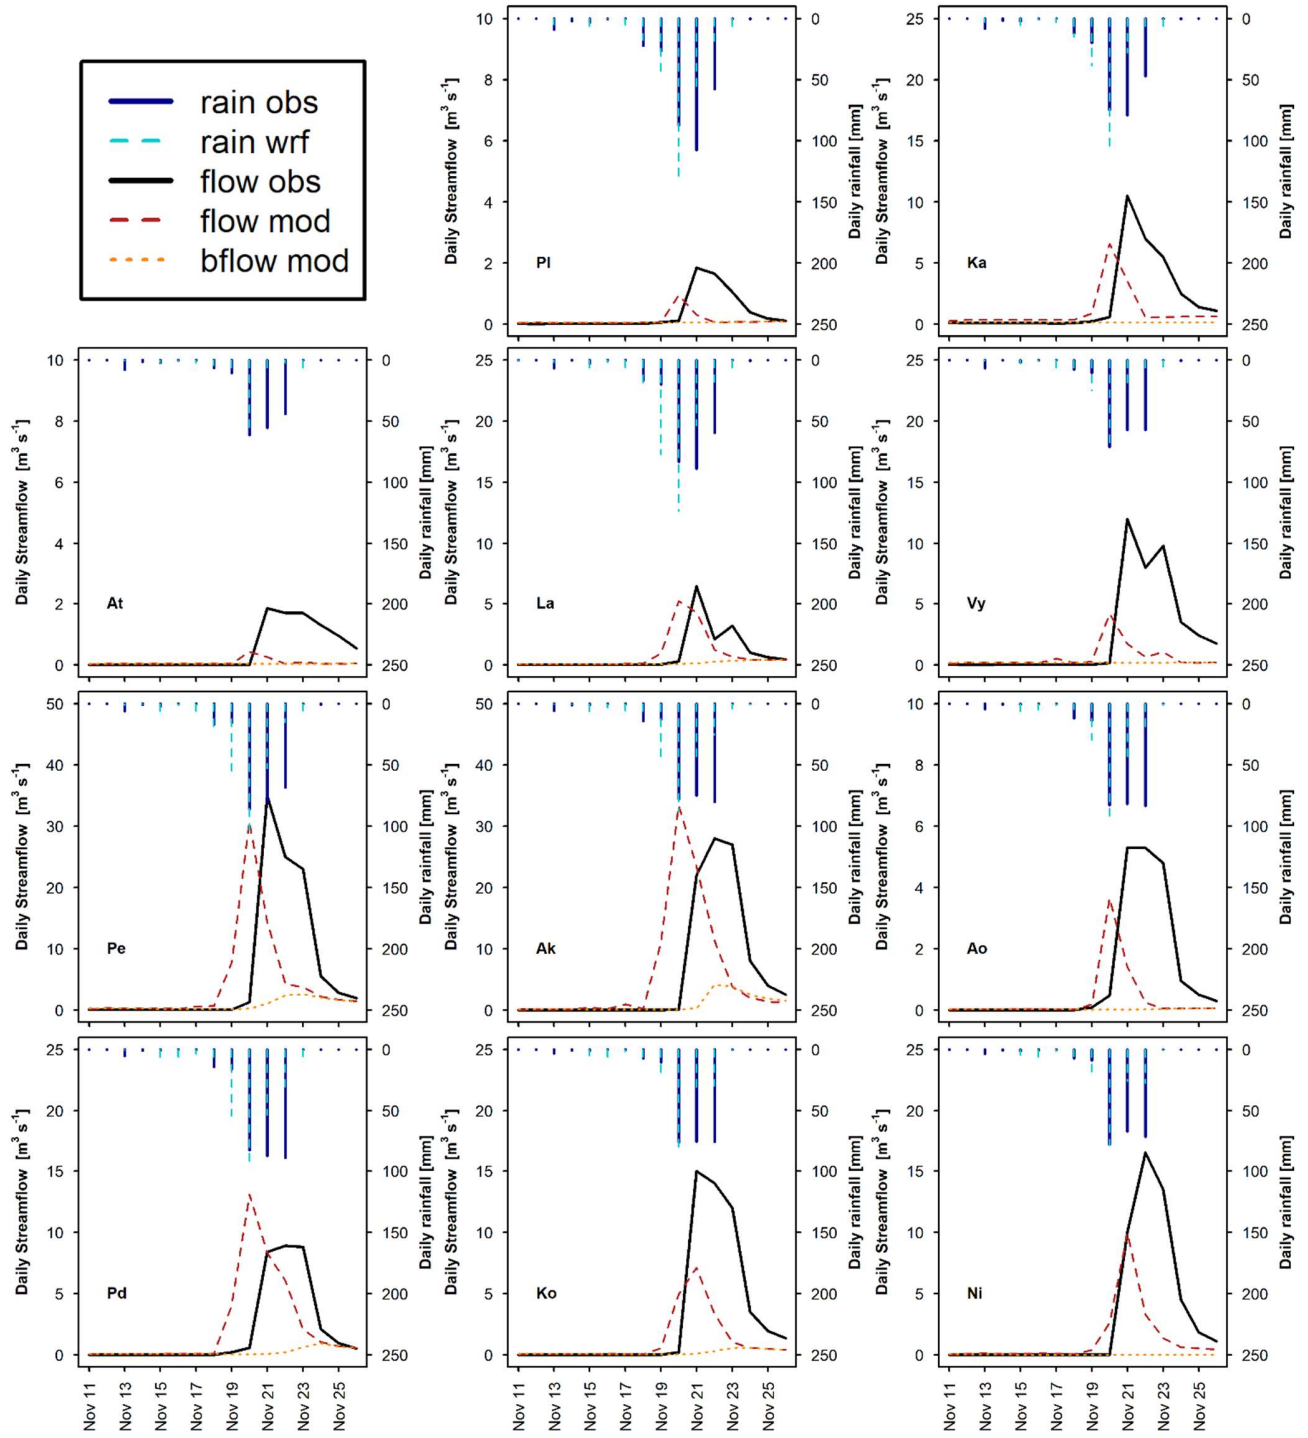

Fig. S4 - Continue
